# Supplementary material
Source: MDPI journal article supplement (https://www.mdpi.com/2073-4344/13/4/781)
Supplement: s1 [file s1]

## Supporting Information:

# Efficient oxidative dehydrogenation of ethylbenzene over K/CeO<sub>2</sub> with exceptional styrene yield

He Sun, Juping Zhang, Kongzhai Li, Hua Wang and Xing Zhu\*

State Key Laboratory of Complex Nonferrous Metal Resources Clean Utilization, Faculty of Metallurgical and Energy Engineering, Kunming University of Science and Technology, Kunming 650093, China

\*Corresponding author: zhuxing2010@hotmail.com

This document provides additional information on experimental details, redox catalyst characterizations and reactivity data.

**Table S1.** Enthalpy change of reaction at different temperatures.

| Temperature (°C) | $\text{C}_8\text{H}_{10}(\text{EBZg}) + \text{CO}_2(\text{g}) = \text{C}_8\text{H}_8(\text{STYg}) + \text{C}$ $\text{C}_8\text{H}_{10}(\text{EBZg}) + 0.5\text{O}_2(\text{g}) = \text{C}_8\text{H}_8(\text{STYg}) + \text{H}_2\text{O}(\text{g})$ |             |
|------------------|---------------------------------------------------------------------------------------------------------------------------------------------------------------------------------------------------------------------------------------------------|-------------|
|                  | O(g)+H <sub>2</sub> O(g)                                                                                                                                                                                                                          |             |
|                  | deltaH (kJ)                                                                                                                                                                                                                                       | deltaH (kJ) |
| 300              | 161.512                                                                                                                                                                                                                                           | -122.119    |
| 350              | 161.589                                                                                                                                                                                                                                           | -122.003    |
| 400              | 161.608                                                                                                                                                                                                                                           | -121.916    |
| 450              | 161.571                                                                                                                                                                                                                                           | -121.858    |
| 500              | 161.478                                                                                                                                                                                                                                           | -121.836    |
| 550              | 161.325                                                                                                                                                                                                                                           | -121.856    |
| 600              | 161.108                                                                                                                                                                                                                                           | -121.925    |
| 650              | 160.819                                                                                                                                                                                                                                           | -122.054    |

The reaction equations of ethylbenzene with CO<sub>2</sub> and ethylbenzene with O<sub>2</sub> were imported into the HSC simulation software, and the temperature range of the simulation experiments was set to 300-700°C, and the information was collected at 50°C intervals. The values of enthalpy changes of the reactions at different temperatures obtained were collected and organized as shown in Table S1.

TableS2. Thermoneutral reaction equation.

| Temperature<br>(°C) | $\text{XC}_8\text{H}_{10}(\text{g}) + \text{CO}_2(\text{g}) + \text{YO}_2(\text{g}) = \text{XC}_8\text{H}_8(\text{Yg}) + \text{CO}(\text{g}) + \text{XH}_2\text{O}(\text{g})$                     |
|---------------------|---------------------------------------------------------------------------------------------------------------------------------------------------------------------------------------------------|
| 300                 | $2.3226\text{C}_8\text{H}_{10}(\text{g}) + \text{CO}_2(\text{g}) + 0.6613\text{O}_2(\text{g}) = 2.3226\text{C}_8\text{H}_8(\text{Yg}) + \text{CO}(\text{g}) + 2.3226\text{H}_2\text{O}(\text{g})$ |
| 350                 | $2.3245\text{C}_8\text{H}_{10}(\text{g}) + \text{CO}_2(\text{g}) + 0.6622\text{O}_2(\text{g}) = 2.3245\text{C}_8\text{H}_8(\text{Yg}) + \text{CO}(\text{g}) + 2.3245\text{H}_2\text{O}(\text{g})$ |
| 400                 | $2.3256\text{C}_8\text{H}_{10}(\text{g}) + \text{CO}_2(\text{g}) + 0.6628\text{O}_2(\text{g}) = 2.3256\text{C}_8\text{H}_8(\text{Yg}) + \text{CO}(\text{g}) + 2.3256\text{H}_2\text{O}(\text{g})$ |
| 450                 | $2.3259\text{C}_8\text{H}_{10}(\text{g}) + \text{CO}_2(\text{g}) + 0.6629\text{O}_2(\text{g}) = 2.3259\text{C}_8\text{H}_8(\text{Yg}) + \text{CO}(\text{g}) + 2.3259\text{H}_2\text{O}(\text{g})$ |
| 500                 | $2.3254\text{C}_8\text{H}_{10}(\text{g}) + \text{CO}_2(\text{g}) + 0.6627\text{O}_2(\text{g}) = 2.3254\text{C}_8\text{H}_8(\text{Yg}) + \text{CO}(\text{g}) + 2.3254\text{H}_2\text{O}(\text{g})$ |
| 550                 | $2.3239\text{C}_8\text{H}_{10}(\text{g}) + \text{CO}_2(\text{g}) + 0.6619\text{O}_2(\text{g}) = 2.3239\text{C}_8\text{H}_8(\text{Yg}) + \text{CO}(\text{g}) + 2.3239\text{H}_2\text{O}(\text{g})$ |
| 600                 | $2.3214\text{C}_8\text{H}_{10}(\text{g}) + \text{CO}_2(\text{g}) + 0.6607\text{O}_2(\text{g}) = 2.3214\text{C}_8\text{H}_8(\text{Yg}) + \text{CO}(\text{g}) + 2.3214\text{H}_2\text{O}(\text{g})$ |
| 650                 | $2.3176\text{C}_8\text{H}_{10}(\text{g}) + \text{CO}_2(\text{g}) + 0.6588\text{O}_2(\text{g}) = 2.3176\text{C}_8\text{H}_8(\text{Yg}) + \text{CO}(\text{g}) + 2.3176\text{H}_2\text{O}(\text{g})$ |

Figure 3.1 was plotted based on Table S1, and it was found that the reaction enthalpy changes of both reactions were in the same order of magnitude. After coupling the enthalpy changes of the two reactions to zero, the equation coefficients were changed and collated and recorded as Table 1. The equation coefficients of EB, CO<sub>2</sub> and O<sub>2</sub> at different temperatures were filled into the equations in Table 1, and the thermoneutral reaction equations at different temperatures as well as mixed atmosphere conditions were obtained and collated as shown in Table S2.

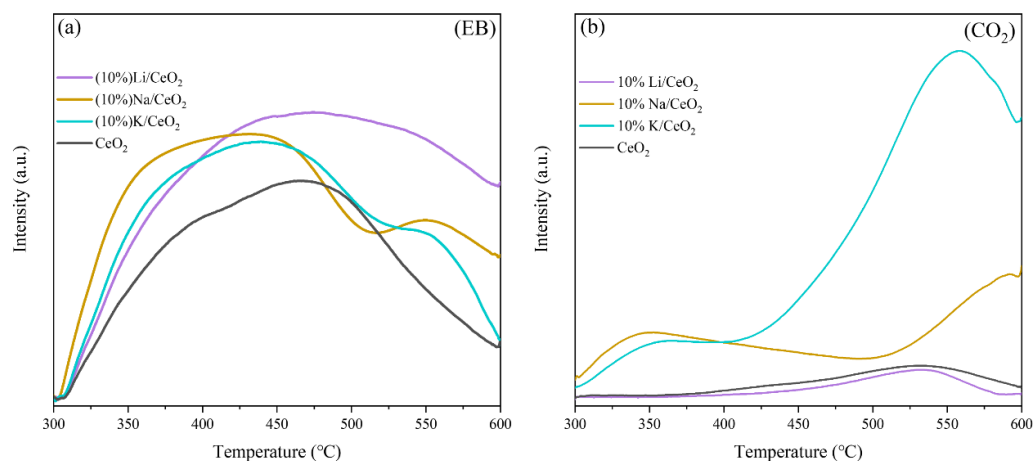

Figure S1. EB-temperature program reduction. (a) ethylbenzene (EB); (b) H<sub>2</sub>O. reaction conditions: ramp rate 10 °C/min, T<sub>EB</sub> = 25 °C, space velocity = 7.5 h<sup>-1</sup>, 10%X/CeO<sub>2</sub> (X=Li, Na, K).

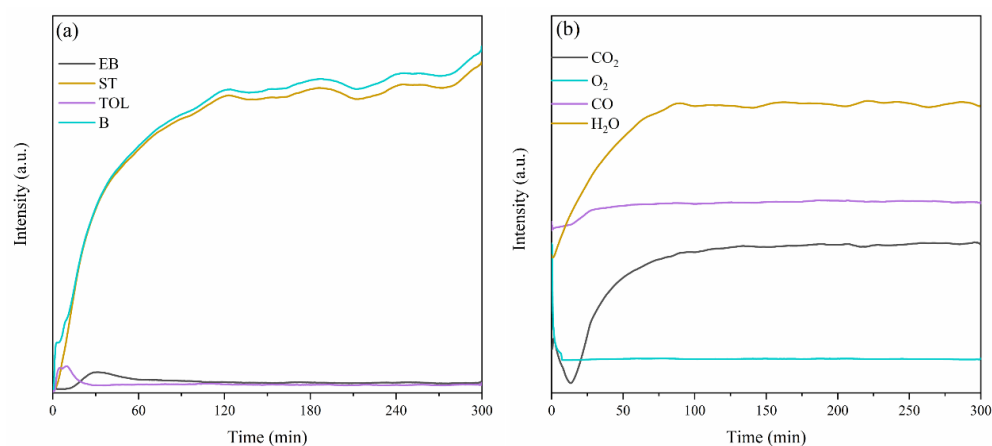

Figure S2. Mass spectra of (a) reactants and (b) products of EB-ODH under mixed atmosphere of  $\text{CO}_2\text{-}4\text{O}_2$ . Experimental conditions: reaction temperature  $500\text{ }^\circ\text{C}$ ,  $\text{TEB}=25\text{ }^\circ\text{C}$ , reaction time 5 h, flow rate  $25\text{ mL/min}$ , atmosphere  $\text{CO}_2\text{-O}_2/\text{Ar}$ , catalyst dosage  $1000\text{ mg}$ , space velocity  $=5.0\text{ h}^{-1}$ .

Raman characterization of the catalyst surface structure changes before and after the 50h stability test. As shown in Figure S3, Raman characterization of the catalyst surface structure changes before and after the 50 h stability test. The band at  $477\text{ cm}^{-1}$  can be assigned to  $\text{F}_{2g}$  vibration mode of the fluorite structure ( $\text{Fm}3\text{m}$  space group), corresponding to the symmetrical stretching mode of Ce-O bonds<sup>[1]</sup>. The sample 10% K/CeO<sub>2</sub> after stability testing showed a small amount of carbon accumulation at  $1330$  and  $1600\text{ cm}^{-1}$ . The presence of a small amount of carbon accumulation did not affect the performance of the catalyst<sup>[2]</sup>.

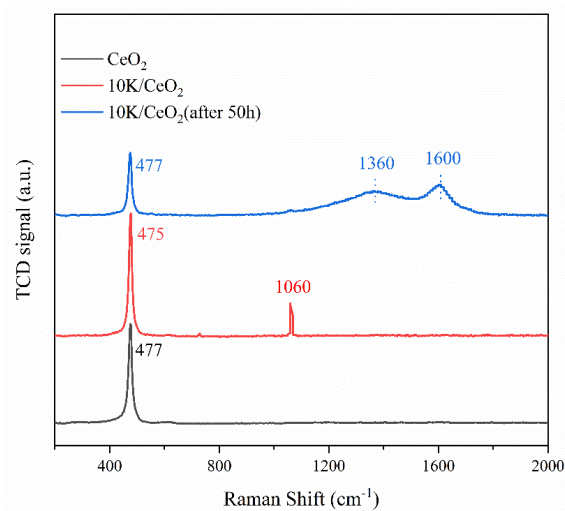

Figure S3. Raman of samples before and after stability testing of 10% K/CeO<sub>2</sub>.

## References

- [1] Wang Huan, Cao Fang-Xian, Song Yong-Hong, Yang Guo-Qing, Ge Han-Qing, Liu Zhao-Tie, Qu Yong-Quan, Liu Zhong-Wen. Two-step hydrothermally synthesized  $\text{Ce}_{1-x}\text{Zr}_x\text{O}_2$  for oxidative dehydrogenation of ethylbenzene with carbon dioxide [J]. Journal of  $\text{CO}_2$  Utilization, 2019, 34: 99-107.
- [2] Zhang Li, Wu Zili, Nelson Nicholas C., Sadow Aaron D., Slowing Igor I., Overbury Steven H. Role Of  $\text{CO}_2$  As a Soft Oxidant For Dehydrogenation of Ethylbenzene to Styrene over a High-Surface-Area Ceria Catalyst [J]. ACS Catalysis, 2015, 5(11): 6426-35.
